# Supplementary material
Source: PubMed Central journal article supplement (PMC4553219)

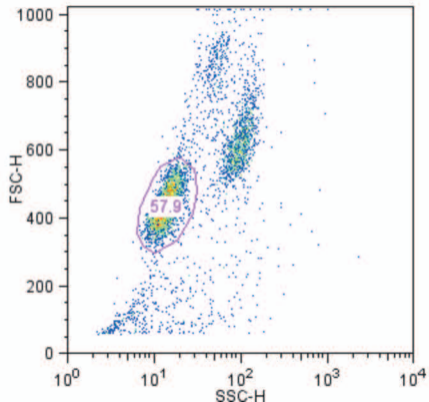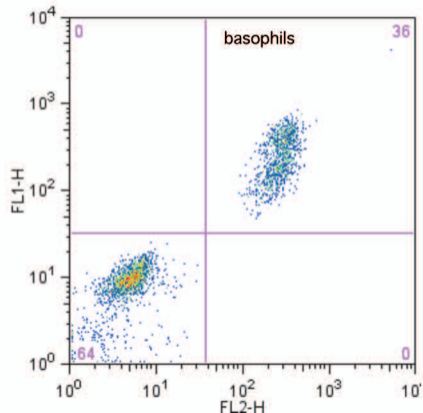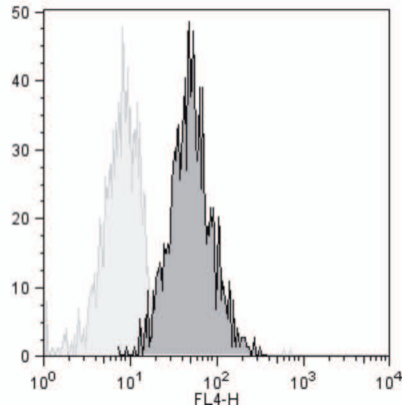

**A**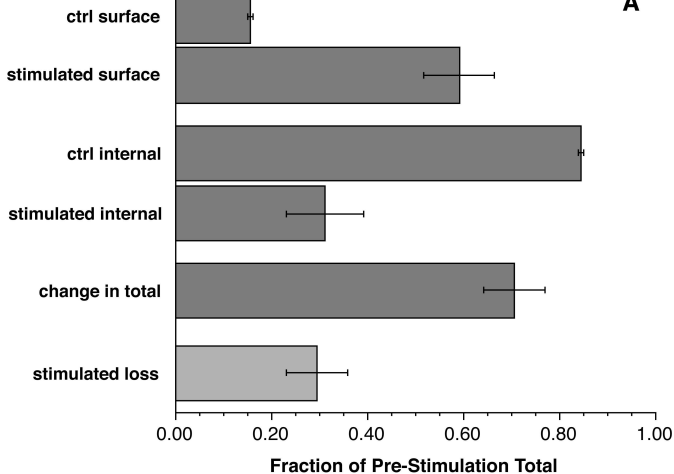**B**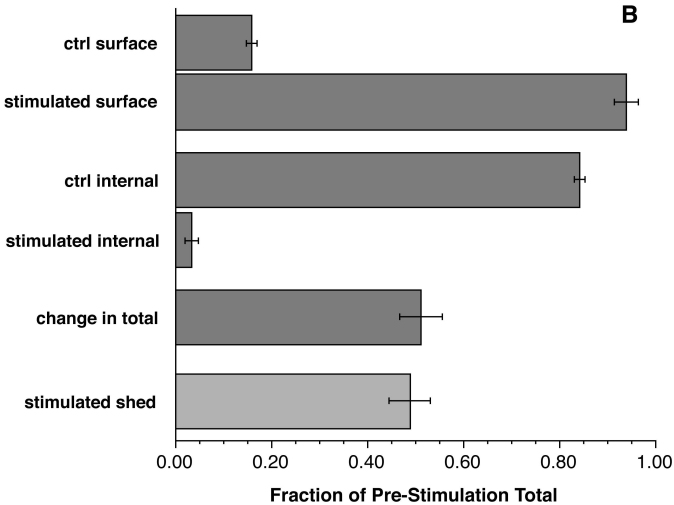

Supplement: NIHMS688076-supplement-Supp_FigureS1-S2.pdf [file NIHMS688076-supplement-Supp_FigureS1-S2.pdf]
